# Supplementary material for: Vaccinia virus hijacks ESCRT-mediated multivesicular body formation for virus egress
Source: Life Sci Alliance. 2021 Jun 18;4(8):e202000910. doi: 10.26508/lsa.202000910 (PMC8321658; doi:10.26508/lsa.202000910)
Supplement: Supplementary file 1 [file LSA-2020-00910_TableS1.xlsx]

## Sheet: Total Screen
Gene Symbol	GENEID	Gene Accession	Low cell number	Rep 1, red cells/nuclei number	Rep 1, green cells/nuclei number	Rep 1, green/red	Rep 1, 75% cut off	Rep 2, red cells/nuclei number	Rep 2, green cells/nuclei number	Rep 2, green/red	Rep 2, 75% cut off		Rep 1, Ctrl, red cells/nuclei number	Rep 1, Ctrl, green cells/nuclei number	Rep 1, Ctrl, green/red	Rep 2,Ctrl, red cells/nuclei number	Rep 2, Ctrl, green cells/nuclei number	Rep 2, Ctrl, green/red
ACTR2	10097	NM_005722		0.00167936	0.132109	78.6667		0.00163199	0.131885	80.8125			0.00212197	0.167635	79	0.00407141	0.216881	53.2692
ACTR3	10096	NM_005721	*	0.00040808	0.0654968	160.5		0.000364697	0.063822	175			0.0022931	0.16625	72.5	0.00305738	0.182855	59.8077
ADAM10	102	NM_001110	*	0.0032704	0.139587	42.6818	ADAM10	0.00361551	0.137265	37.9655	ADAM10		0.00162319	0.129507	79.7857	0.0038624	0.219312	56.7812
AMPH	273	NM_139316		0.00733844	0.284556	38.7761	AMPH	0.00312034	0.129562	41.5217	AMPH		0.00132526	0.131484	99.2143	0.00278822	0.180386	64.6957
AP1B1	162	NM_145730		0.00833529	0.237849	28.5352	AP1B1	0.00386598	0.182714	47.2619	AP1B1		0.00189149	0.132603	70.1053	0.00223947	0.196477	87.7333
AP1M1	8907	NM_032493		0.00354529	0.211002	59.5161		0.00151078	0.0916083	60.6364			0.00252636	0.172012	68.087	0.00266845	0.172615	64.6875
AP1M2	10053	NM_005498		0.00180723	0.155181	85.8667		0.00176231	0.153872	87.3125
AP2A1	160	NM_130787		0.00769917	0.206427	26.8116	AP2A1	0.00394785	0.231638	58.6744
AP2A2	161	NM_012305		0.0067391	0.269839	40.0408	AP2A2	0.0062483	0.199946	32	AP2A2
AP2B1	163	NM_001282		0.00516387	0.220466	42.6939	AP2B1	0.00581217	0.244009	41.9825	AP2B1
AP2M1	1173	NM_001025205		0.00467449	0.199983	42.7818	AP2M1	0.00120907	0.146801	121.417
AP3D1	8943	NM_003938		0.00341211	0.219259	64.2593		0.00341458	0.217238	63.6207
AP4E1	23431	NM_007347		0.00253961	0.178014	70.0952		0.00242344	0.17603	72.6364
ARPC3	10094	NM_005719		0.00113653	0.0934792	82.25		0.00117157	0.0937256	80
ARF1	375	NM_001658		0.00422269	0.232581	55.0789	ARF1	0.00128684	0.0940677	73.1
ARF6	382	NM_001663		0.00639081	0.213497	33.4068	ARF6	0.00428705	0.0523765	12.2174	ARF6
ARFIP2	23647	NM_012402		0.00255918	0.194626	76.05		0.00269858	0.191717	71.0435
ARPC1B	10095	NM_005720		0.00283648	0.187207	66		0.00325903	0.18772	57.6
ARPC2	10109	NM_005731		0.00140845	0.117157	83.1818		0.00138696	0.116736	84.1667
ARPC4	10093	NM_001024960		0.0036406	0.235183	64.6		0.0038739	0.233903	60.3793
ARPC5	10092	NM_005717		0.00126823	0.149271	117.7		0.00128116	0.146168	114.091
ARRB1	408	NM_020251		0.00339186	0.135176	39.8529	ARRB1	0.00287015	0.131334	45.7586	ARRB1
ARRB2	409	NM_199004		0.00404176	0.209582	51.8542	ARRB2	0.00353426	0.263401	74.5278
ATG12	9140	NM_004707		0.00765607	0.247114	32.2769	ATG12	0.00739946	0.24429	33.0145	ATG12
ATM	472	NM_138292		0.00358885	0.199595	55.6154	ATM	0.00353291	0.452306	128.026
ATP6V0A1	535	NM_005177		0.00543478	0.281896	51.8689	ATP6V0A1	0.00247185	0.143642	58.1111
BECN1	8678	NM_003766		0.00625664	0.26089	41.6981	BECN1	0.00416854	0.159306	38.2162	BECN1
BET1	10282	NM_005868	*	0.00237099	0.134449	56.7059	BET1	0.00254939	0.135245	53.05
BET1L	51272	NM_016526		0.00585394	0.268257	45.825	BET1L	0.00574241	0.268936	46.8333	BET1L
BIN1	274	NM_139351		0.0106829	0.264784	24.7857	BIN1	0.00407498	0.154442	37.9	BIN1
C13ORF9	51028	NM_016075		0.00547689	0.33035	60.3171		0.00552486	0.324526	58.7391
CAMK1	8536	NM_003656		0.00506154	0.282986	55.9091	CAMK1	0.0039343	0.191207	48.6
CAV1	857	NM_001753		0.0059431	0.238309	40.0984	CAV1	0.00175016	0.127215	72.6875
CAV2	858	NM_198212		0.00362732	0.185201	51.0571	CAV2	0.00126684	0.125763	99.2727
CAV3	859	NM_001234		0.00437214	0.260498	59.5814		0.00397914	0.152991	38.4483	CAV3
CBL	867	NM_005188		0.00399777	0.201562	50.4186	CBL	0.00101948	0.118373	116.111
CBLB	868	NM_170662		0.00481589	0.252232	52.375	CBLB	0.00294256	0.217985	74.08
CBLC	23624	NM_012116		0.00348736	0.206003	59.0714		0.00326319	0.203218	62.2759
CDC42	998	NM_044472		0.00433422	0.185167	42.7222	CDC42	0.000320307	0.043722	136.5
CFL1	1072	NM_005507		0.00623651	0.250899	40.2308	CFL1	0.00157698	0.156121	99
CIB1	10519	NM_006384		0.00137226	0.132111	96.2727		0.00123986	0.129509	104.455
CIB2	10518	NM_006383		0.00336067	0.191827	57.08	CIB2	0.00301641	0.187621	62.2
CIB3	117286	NM_054113		0.00304077	0.180788	59.4545		0.00294042	0.178599	60.7391
CLTA	1211	NM_001833		0.00365398	0.189133	51.7609	CLTA	0.00224797	0.141622	63
CLTB	1212	NM_001834		0.00516385	0.207944	40.2692	CLTB	0.00292612	0.139409	47.6429	CLTB
CLTC	1213	NM_004859		0.00530875	0.263947	49.7193	CLTC	0.00300409	0.175078	58.28
CLTCL1	8218	NM_001835		0.00480362	0.187341	39	CLTCL1	0.00274485	0.0767311	27.9545	CLTCL1
COPA	1314	NM_004371	*	0.00324575	0.190881	58.8095		0.00121911	0.149728	122.818
DAB2	1601	NM_001343		0.00415734	0.254131	61.1282		0.00179382	0.154057	85.8824
DDEF2	8853	NM_003887		0.00399787	0.250933	62.7667		0.00245734	0.061843	25.1667	DDEF2
DIAPH1	1729	NM_005219		0.00270499	0.173795	64.25		0.00319454	0.194316	60.8276
DNM1	1759	NM_004408		0.00620323	0.256696	41.381	DNM1	0.00187142	0.180537	96.4706
DNM2	1785	NM_001005362		0.00726073	0.315732	43.4848	DNM2	0.00320627	0.110319	34.4074	DNM2
DNM3	26052	NM_015569		0.00332005	0.206375	62.16		0.00327511	0.206938	63.1852
EEA1	8411	NM_003566		0.00802508	0.261066	32.5312	EEA1	0.00502737	0.169813	33.7778	EEA1
EFS	10278	NM_032459		0.00354031	0.410403	115.923		0.00343558	0.407239	118.536
ELKS	23085	NM_178038		0.00318345	0.191272	60.0833		0.00330518	0.188028	56.8889
ENTH	9685	NM_014666		0.00414884	0.21924	52.8438	ENTH	0.00423081	0.217064	51.3056
EPIM	2054	NM_001980	*	0.00430828	0.168821	39.1852	EPIM	0.00464489	0.166767	35.9032	EPIM
EPN1	29924	NM_013333		0.00155815	0.129883	83.3571		0.0016375	0.129465	79.0625
EPN2	22905	NM_148921		0.00351185	0.323968	92.25		0.0033056	0.321669	97.3103
EPN3	55040	NM_017957		0.00245308	0.1229	50.1	EPN3	0.00272634	0.122799	45.0417	EPN3
EPS15	2060	NM_001981		0.00377707	0.19347	51.2222	EPS15	0.00370969	0.195853	52.7949
EPS15L1	58513	NM_021235		0.00499303	0.194032	38.8605	EPS15L1	0.00469974	0.192376	40.9333	EPS15L1
FLJ20366	55638	NM_017786		0.00420894	0.248327	59		0.0042302	0.246335	58.2326
FLJ31164	203062	NM_145003	*	0.00206576	0.18368	88.9167		0.00224072	0.181338	80.9286
FYN	2534	NM_153048		0.00363934	0.284596	78.2		0.00192484	0.156095	81.0952
GAF1	26056	NM_015470		0.00184638	0.201625	109.2		0.00181077	0.200543	110.75
GIT1	28964	NM_014030		0.00333422	0.168845	50.64	GIT1	0.00319764	0.166277	52
GORASP1	64689	NM_031899		0.00357824	0.220897	61.7333		0.00369806	0.217207	58.7353
GOSR1	9527	NM_001007025	*	0.00171592	0.0796949	46.4444	GOSR1	0.00159546	0.0792413	49.6667
GOSR2	9570	NM_054022		0.00232558	0.126193	54.2632	GOSR2	0.00247358	0.125478	50.7273
GRB2	2885	NM_203506		0.00641141	0.240293	37.4789	GRB2	0.0020051	0.140357	70
HGS	9146	NM_004712		0.00508776	0.367464	72.225		0.00488032	0.363584	74.5
HIP1	3092	NM_005338		0.00521524	0.196411	37.661	HIP1	0.00150263	0.131574	87.5625
HIP1R	9026	NM_003959		0.00432359	0.258505	59.7895		0.00441614	0.257266	58.2558
IHPK3	117283	NM_054111		0.00185423	0.163457	88.1538		0.00210277	0.161651	76.875
ITSN1	6453	NM_001001132		0.00407807	0.22876	56.0952	ITSN1	0.00208575	0.137428	65.8889
ITSN2	50618	NM_147152		0.00394255	0.11363	28.8214	ITSN2	0.00373856	0.111899	29.931	ITSN2
LIMK1	3984	NM_016735		0.00476546	0.260138	54.5882	LIMK1	0.00311192	0.179096	57.5517
LOC390846	390846	XM_937289		0.0016772	0.131338	78.3077		0.00152959	0.12778	83.5385
MAP1LC3A	84557	NM_181509	*	0.00328048	0.169081	51.5417	MAP1LC3A	0.00326223	0.151685	46.4972	MAP1LC3A
MAP4K2	5871	NM_004579		0.00502076	0.225258	44.8654	MAP4K2	0.00283795	0.163182	57.5
MAPK8IP1	9479	NM_005456	*	0	0.134973	N/A		0	0.129955	NA
MAPK8IP2	23542	NM_139124		0.00173418	0.156447	90.2143		0.00180059	0.156201	86.75
MAPK8IP3	23162	NM_033392	*	0.00416351	0.214358	51.4848	MAPK8IP3	0.00446377	0.213689	47.8718	MAPK8IP3
NEDD4	4734	NM_006154		0.00605632	0.279701	46.1833	NEDD4	0.00321812	0.151013	46.9259	NEDD4
NEDD4L	23327	NM_015277		0.00267278	0.206567	77.2857		0.00244755	0.203963	83.3333
NSF	4905	NM_006178		0.00448693	0.256145	57.087	NSF	0.00166719	0.167448	100.437
PACSIN1	29993	NM_020804		0.00358911	0.258911	72.1379		0.00361541	0.257259	71.1562
PACSIN3	29763	NM_016223		0.00212846	0.136722	64.2353		0.00195807	0.135568	69.2353
PAK1	5058	NM_002576		0.00510762	0.264411	51.7679	PAK1	0.00240858	0.131596	54.6364
PDCD6IP	10015	NM_013374		0.00281203	0.187973	66.8462		0.00265984	0.187174	70.3704
PICALM	8301	NM_001008660		0.0046414	0.236822	51.0238	PICALM	0.0033675	0.14612	43.3913	PICALM
PIK3C2G	5288	NM_004570		0.00520231	0.227842	43.7963	PIK3C2G	0.00327497	0.13251	40.4615	PIK3C2G
PIK3CG	5294	NM_002649		0.00392285	0.183148	46.6875	PIK3CG	0.00159639	0.161142	100.941
PIK4CA	5297	NM_002650		0.00553262	0.225345	40.7302	PIK4CA	0.00154934	0.105549	68.125
PIP5K1A	8394	NM_003557		0.00506127	0.249867	49.3684	PIP5K1A	0.00187793	0.114286	60.8571
PSCD3	9265	NM_004227		0.00144321	0.108385	75.1		0.00133316	0.108386	81.3
RAB1B	81876	NM_030981		0.00221976	0.175139	78.9		0.00221595	0.173751	78.4091
RAB10	10890	NM_016131		0.00147835	0.172017	116.357		0.00154455	0.169514	109.75
RAB11A	8766	NM_004663		0.00615612	0.242674	39.42	RAB11A	0.00543216	0.1352	24.8889	RAB11A
RAB11B	9230	NM_004218		0.003718	0.200772	54	RAB11B	0.00398089	0.200637	50.4
RAB12	201475	NM_001025300		0.00358969	0.421516	117.424		0.00345713	0.417325	120.714
RAB13	5872	NM_002870		0.00209473	0.129757	61.9444		0.00204543	0.129077	63.1053
RAB14	51552	NM_016322	*	0.00253893	0.203791	80.2667		0.00253044	0.199747	78.9375
RAB15	376267	NM_198686		0.00175913	0.181191	103		0.00160355	0.179845	112.154
RAB17	64284	NM_022449		0.00299646	0.229093	76.4545		0.0029525	0.227728	77.1304
RAB18	22931	NM_021252	*	0.00582557	0.183422	31.4857	RAB18	0.00557017	0.18134	32.5556	RAB18
RAB19B	401409	NM_001008749		0.00160256	0.151743	94.6875		0.00153804	0.1491	96.9412
RAB1A	5861	NM_004161		0.00483707	0.156229	32.2982	RAB1A	0.00298285	0.134321	45.0313	RAB1A
RAB2	5862	NM_002865		0.00439599	0.249516	56.76	RAB2	0.00291545	0.120941	41.4828	RAB2
RAB20	55647	NM_017817		0.00241284	0.15599	64.65		0.00234873	0.154793	65.9048
RAB21	23011	NM_014999		0.00336868	0.318528	94.5556		0.00319781	0.313728	98.1071
RAB22A	57403	NM_020673		0.00161777	0.160699	99.3333		0.00145673	0.155774	106.933
RAB23	51715	NM_183227		0.00213675	0.661859	309.75		0.00222394	0.656546	295.217
RAB24	53917	NM_001031677		0.00362188	0.272486	75.2333		0.003806	0.26642	70
RAB25	57111	NM_020387		0.00281042	0.214614	76.3636		0.00304129	0.21137	69.5
RAB26	25837	NM_014353		0.00221457	0.207923	93.8889		0.00225352	0.203042	90.1
RAB27A	5873	NM_183236		0.00259105	0.107528	41.5	RAB27A	0.00250066	0.10766	43.0526	RAB27A
RAB27B	5874	NM_004163		0.00298975	0.21996	73.5714		0.00286496	0.218648	76.3182
RAB28	9364	NM_004249		0.00319404	0.147325	46.125	RAB28	0.0033068	0.145744	44.0741	RAB28
RAB2B	84932	NM_032846		0.00245989	0.184706	75.087		0.00241616	0.182468	75.52
RAB30	27314	NM_014488		0.00260623	0.154901	59.4348		0.00275033	0.152287	55.3704
RAB31	11031	NM_006868	*	0.00369058	0.185267	50.2	RAB31	0.00356213	0.183313	51.4615
RAB32	10981	NM_006834		0.00262266	0.223473	85.2083		0.00279748	0.221401	79.1429
RAB33A	9363	NM_004794		0.0025788	0.140258	54.3889	RAB33A	0.00251622	0.137995	54.8421
RAB33B	83452	NM_031296		0.00345877	0.226757	65.56		0.00348162	0.224887	64.5926
RAB34	83871	NM_031934		0.00276382	0.181281	65.5909		0.0025522	0.178538	69.9545
RAB35	11021	NM_006861		0.00192569	0.252039	130.882		0.00195856	0.246882	126.053
RAB36	9609	NM_004914		0.00302592	0.324957	107.391		0.00285476	0.317711	111.292
RAB37	326624	NM_001006637		0.00365631	0.371915	101.719		0.00358386	0.36412	101.6
RAB38	23682	NM_022337		0.00359801	0.204094	56.7241	RAB38	0.00351076	0.202152	57.5806
RAB39	54734	NM_017516		0.00247396	0.230729	93.2632		0.00283856	0.228031	80.3333
RAB39B	116442	NM_171998		0.00311024	0.158968	51.1111	RAB39B	0.00340452	0.15506	45.5455	RAB39B
RAB3A	5864	NM_002866		0.00500865	0.283125	56.5273	RAB3A	0.00493192	0.14903	30.2174	RAB3A
RAB3B	5865	NM_002867		0.00408694	0.239179	58.5227	RAB3B	0.00316111	0.148463	46.9655	RAB3B
RAB3C	115827	NM_138453		0.00197555	0.117916	59.6875		0.00204012	0.115947	56.8333
RAB3D	9545	NM_004283		0.0031348	0.210755	67.2308		0.00316525	0.210871	66.6207
RAB40A	142684	NM_080879		0.00468518	0.267512	57.0976	RAB40A	0.00468506	0.262988	56.1333
RAB40B	10966	NM_006822		0.00237941	0.405689	170.5		0.0022822	0.40256	176.391
RAB40C	57799	NM_021168		0.00143584	0.141496	98.5455		0.00143558	0.139012	96.8333
RAB41	347517	NM_001032726		0.00256191	0.251601	98.2083		0.00239532	0.245664	102.56
RAB42	115273	NM_152304		0.0051683	0.330109	63.8718		0.00518455	0.32675	63.0238
RAB43	339122	NM_198490		0.00453265	0.29989	66.1622		0.00472424	0.294221	62.2791
RAB4A	5867	NM_004578		0.00354868	0.590082	166.282		0.00306917	0.112792	36.75	RAB4A
RAB4B	53916	NM_016154		0.00388471	0.215539	55.4839	RAB4B	0.00437435	0.213768	48.8684
RAB5A	5868	NM_004162		0.00475783	0.27643	58.1	RAB5A	0.00191668	0.111873	58.3684
RAB5B	5869	NM_002868		0.00448598	0.23215	51.75	RAB5B	0.00449438	0.116144	25.8421	RAB5B
RAB5C	5878	NM_004583		0.00610487	0.332934	54.5357	RAB5C	0.00321085	0.171334	53.3611
RAB6A	5870	NM_002869		0.00546397	0.210132	38.4576	RAB6A	0.0028867	0.0814289	28.2083	RAB6A
RAB6B	51560	NM_016577		0.00284934	0.184257	64.6667		0.00306346	0.182932	59.7143
RAB6C	84084	NM_032144		0.00173932	0.157735	90.6875		0.00208065	0.154563	74.2857
RAB7	7879	NM_004637		0.0011776	0.570603	484.545		0.00126263	0.565462	447.846
RAB7B	338382	NM_177403		0.0038796	0.17699	45.6207	RAB7B	0.00379716	0.174424	45.9355	RAB7B
RAB7L1	8934	NM_003929		0.00913242	0.28741	31.4714	RAB7L1	0.0042029	0.000289855	0.0689655	RAB7L1
RAB8A	4218	NM_005370		0.0035512	0.200389	56.4286	RAB8A	0.0022248	0.200232	90
RAB8B	51762	NM_016530		0.00231303	0.18607	80.4444		0.002229	0.185711	83.3158
RAB9A	9367	NM_004251		0.00484051	0.238054	49.1795	RAB9A	0.00469106	0.238708	50.8857
RAB9B	51209	NM_016370		0.00280866	0.224225	79.8333		0.0026678	0.218653	81.96
RABGEF1	27342	NM_014504		0.00245758	0.155998	63.4762		0.00226586	0.155373	68.5714
RABL2B	11158	NM_007081		0.00231849	0.161196	69.5263		0.00238881	0.16005	67
RABL3	285282	NM_173825		0.00266957	0.200316	75.037		0.00254499	0.1976	77.6429
RABL4	11020	NM_006860		0.00185226	0.149488	80.7059		0.00179838	0.148067	82.3333
RABL5	64792	NM_001130820		0.00316085	0.229806	72.7037		0.00320821	0.226072	70.4667
RAC1	5879	NM_006908		0.0038581	0.257175	66.6585		0.00429512	0.172473	40.1556	RAC1
RHOA	387	NM_001664	*	0.00707756	0.234886	33.1875	RHOA	0	0.000201126	NA
ROCK1	6093	NM_005406		0.00342694	0.247882	72.3333		0.00321696	0.11704	36.3824	ROCK1
ROCK2	9475	NM_004850	*	0.00330281	0.22324	67.5909		0.00324081	0.221361	68.3043
SARA1	56681	NM_020150		0.00347007	0.2087	60.1429		0.0033761	0.205604	60.9
SEC13L1	6396	NM_183352		0.00209539	0.166434	79.4286		0.00280384	0.100183	35.7308	SEC13L1
SEC22L1	9554	NM_004892	*	0.00340186	0.1343	39.4783	SEC22L1	0.00342222	0.134607	39.3333	SEC22L1
SEC22L3	9117	NM_032970		0.00375328	0.207932	55.4	SEC22L3	0.0039049	0.204089	52.2647
SH3GLB1	51100	NM_016009		0.00298401	0.186441	62.48		0.00314159	0.186112	59.2414
SH3GLB2	56904	NM_020145		0.0040313	0.242234	60.0882		0.00386515	0.240928	62.3333
SNAP23	8773	NM_130798		0.00437008	0.240479	55.0286	SNAP23	0.00430233	0.238372	55.4054
SNAP25	6616	NM_130811	*	0.00371471	0.154829	41.68	SNAP25	0.00366002	0.15345	41.9259	SNAP25
SNAP29	9342	NM_004782	*	0.00421372	0.198045	47	SNAP29	0.00391788	0.198245	50.6
SNAP91	9892	NM_014841		0.00425998	0.229674	53.9143	SNAP91	0.0041841	0.228364	54.5789
SNAPAP	23557	NM_012437		0.00206298	0.14354	69.5789		0.00223293	0.14373	64.3684
SNPH	9751	NM_014723		0.00283366	0.136583	48.2	SNPH	0.00292939	0.137681	47	SNPH
SNX1	6642	NM_148955		0.00509978	0.239357	46.9348	SNX1	0.00227953	0.172817	75.8125
SNX2	6643	NM_003100		0.0043256	0.195537	45.2045	SNX2	0.00281621	0.114852	40.7826	SNX2
STAU	6780	NM_017454		0.00388021	0.196597	50.6667	STAU	0.0032606	0.0690996	21.1923	STAU
STX10	8677	NM_003765		0.00287356	0.190871	66.4231		0.00280364	0.187544	66.8929
STX11	8676	NM_003764		0.00535404	0.179896	33.6	STX11	0.00490691	0.179247	36.5294	STX11
STX12	23673	NM_177424		0.00445484	0.637599	143.125		0.0043138	0.632624	146.651
STX16	8675	NM_001001434		0.00179574	0.1211	67.4375		0.0018065	0.117423	65
STX17	55014	NM_017919		0.00340922	0.185747	54.4839	STX17	0.0035479	0.181855	51.2571
STX18	53407	NM_016930	*	0.00525947	0.175842	33.4333	STX18	0.00525729	0.171101	32.5455	STX18
STX19	415117	NM_001001850		0.00116252	0.184957	159.1		0.00126609	0.180207	142.333
STX1A	6804	NM_004603	*	0.00379997	0.181183	47.68	STX1A	0.00385384	0.179989	46.7037	STX1A
STX1B2	112755	NM_052874	*	0.00426095	0.175287	41.1379	STX1B2	0.00423961	0.176422	41.6129	STX1B2
STX3A	6809	NM_004177	*	0.00372745	0.180707	48.48	STX3A	0.00374688	0.180822	48.2593	STX3A
STX4A	6810	NM_004604	*	0.00102941	0.0917647	89.1429		0.0010846	0.0931399	85.875
STX5A	6811	NM_003164		0.00147394	0.0763768	51.8182	STX5A	0.00170982	0.0751099	43.9286	STX5A
STX6	10228	NM_005819		0.00410331	0.209751	51.1176	STX6	0.00409428	0.206484	50.4324
STX7	8417	NM_003569		0.00247729	0.283237	114.333		0.00249973	0.276818	110.739
STX8	9482	NM_004853		0.00255669	0.300467	117.522		0.0026178	0.292388	111.692
SYBL1	6845	NM_005638		0.00258425	0.218731	84.64		0.00252549	0.213638	84.5926
SYNJ1	8867	NM_003895		0.00488349	0.263988	54.0571	SYNJ1	0.00196345	0.0980214	49.9231
SYNJ2	8871	NM_003898		0.00629887	0.326129	51.7759	SYNJ2	0.00225666	0.114187	50.6
SYT1	6857	NM_005639		0.00562249	0.2251	40.0357	SYT1	0.0038373	0.438315	114.225
SYT2	127833	NM_177402		0.00306974	0.237721	77.44		0.00295455	0.235114	79.5769
TNIK	23043	NM_015028		0.00188632	0.167379	88.7333		0.00195492	0.164213	84
TSG101	7251	NM_006292		0.0055176	0.297863	53.9841	TSG101	0.00475949	0.163241	34.2979	TSG101
VAMP1	6843	NM_016830		0.00484919	0.227039	46.82	VAMP1	0.00336445	0.108965	32.3871	VAMP1
VAMP2	6844	NM_014232		0.00611785	0.306751	50.1404	VAMP2	0.00417497	0.246892	59.1364
VAMP3	9341	NM_004781		0.00267738	0.128514	48	VAMP3	0.00261845	0.128928	49.2381
VAMP4	8674	NM_003762		0.00241955	0.162473	67.15		0.00256582	0.158858	61.913
VAMP8	8673	NM_003761		0.00389816	0.301498	77.3438		0.00407286	0.299695	73.5833
VAPA	9218	NM_194434		0.00301767	0.192125	63.6667		0.00309098	0.190566	61.6522
VAPB	9217	NM_004738		0.00631431	0.325889	51.6111	VAPB	0.00610802	0.323403	52.9474
WAS	7454	NM_000377		0.00471754	0.273381	57.95	WAS	0.00511856	0.101744	19.8776	WAS
WASF1	8936	NM_001024936		0.00365854	0.272629	74.5185		0.00300335	0.0992261	33.0385	WASF1
WASF2	10163	NM_006990		0.00272794	0.169027	61.9615		0.00341255	0.15198	44.5357	WASF2
WASF3	10810	NM_006646		0.00157533	0.163497	103.786		0.00265893	0.160382	60.3182
VAV2	7410	NM_003371		0.00477129	0.23037	48.2826	VAV2	0.00409549	0.232045	56.6585
VCP	7415	NM_007126	*	0.00516796	0.22131	42.8235	VCP	0.00483969	0.349264	72.1667
VIL2	7430	NM_003379		0.00624464	0.307824	49.2941	VIL2	0.00429287	0.141545	32.9722	VIL2
VPS4A	27183	NM_013245		0.0028792	0.162152	56.3182	VPS4A	0.00310973	0.0155486	5	VPS4A
VTI1A	143187	NM_145206		0.00379568	0.233597	61.5429		0.00246679	0.164421	66.6538
VTI1B	10490	NM_006370		0.00493963	0.353458	71.5556		0.0017582	0.161134	91.6471
YKT6	10652	NM_006555		0.0030399	0.179481	59.0417		0.00285063	0.176967	62.08
Table S1. Results of VACV spread screen targeting cellular membrane- trafficking factors. Tab 1 lists the 224 cellular genes (gene symbol, GENEID and Gene Accession) depleted by siRNA in the VACV spread screen. The screening results (cell number, green/red ratio) across replicates is shown. Tab 2 lists the of 42 genes (gene symbol, GENEID, and Gene Accession) whose depletion reduced VACV spread b…

## Sheet: Hit Selection
Gene Symbol	GENEID	Gene Accession	Green/red ratio, Avg.
RAB3B	5865	NM_002867	0.738689
MAP1LC3A	84557	NM_181509	0.690374
RAB2	5862	NM_002865	0.684902
RAB39B	116442	NM_171998	0.68024
SNPH	9751	NM_014723	0.672883
STX5A	6811	NM_003164	0.672231
EPN3	55040	NM_017957	0.669863
PICALM	8301	NM_001008660	0.662981
NEDD4	4734	NM_006154	0.6594
RAB7B	338382	NM_177403	0.648121
RAB28	9364	NM_004249	0.636918
CLTB	1212	NM_001834	0.627104
TSG101	7251	NM_006292	0.611433
ARRB1	408	NM_020251	0.609831
SNX2	6643	NM_003100	0.60551
RAB27A	5873	NM_183236	0.599396
AP2B1	163	NM_001282	0.598741
RAB3A	5864	NM_002866	0.596078
PIK3C2G	5288	NM_004570	0.594007
VIL2/EZR	7430	NM_003379	0.571137
AMPH	273	NM_139316	0.570093
EPS15L1	58513	NM_021235	0.566071
BECN1	8678	NM_003766	0.56317
RAB1A	5861	NM_004161	0.555837
VAMP1	6843	NM_016830	0.550764
AP1B1	162	NM_145730	0.549043
DNM2	1785	NM_001005362	0.545079
RAB5B	5869	NM_002868	0.53158
WAS	7454	NM_000377	0.525025
AP2A2	161	NM_012305	0.504371
STX11	8676	NM_003764	0.498259
STAU	6780	NM_017454	0.488599
EEA1	8411	NM_003566	0.470086
CLTCL1	8218	NM_001835	0.466347
RAB6A	5870	NM_002869	0.464843
ATG12	9140	NM_004707	0.462541
BIN1	274	NM_139351	0.452466
RAB11A	8766	NM_004663	0.445269
ITSN2	50618	NM_147152	0.416519
VPS4A	27183	NM_013245	0.399243
ARF6	382	NM_001663	0.308544
RAB7L1/RAB29	8934	NM_003929	0.201977
